# Supplementary material
Source: PubMed Central journal article supplement (PMC5325063)
Supplement: NIHMS838651-supplement-310152R1_Online_Supplement.pdf [file NIHMS838651-supplement-310152R1_Online_Supplement.pdf]

**Supplemental Figure I. Gene editing approaches using CRISPR/Cas9.** Schematic display for lncRNA silencing by (A) entire loci deletion, (B) deletion of a functional motif, (C) promoter region deletion and (D) introduction of RNA-Destabilizing Elements.

## Supp. Figure 1

### A) Entire loci deletion

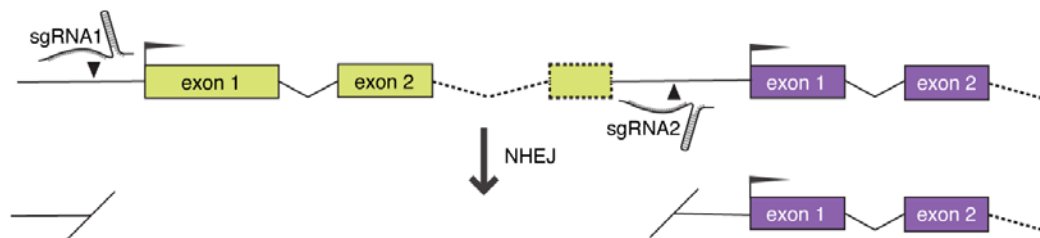

### B) Deletion of a functional motif

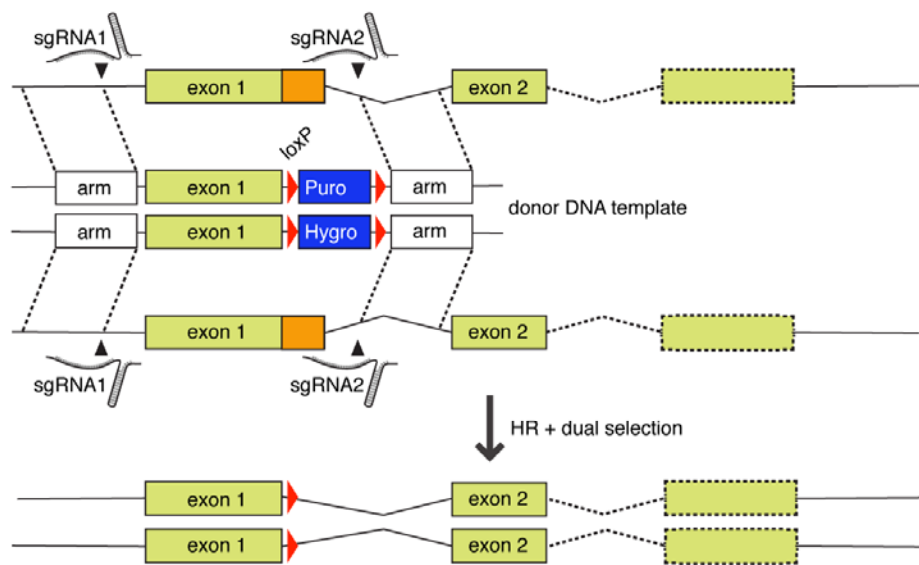

### C) Promoter region deletion

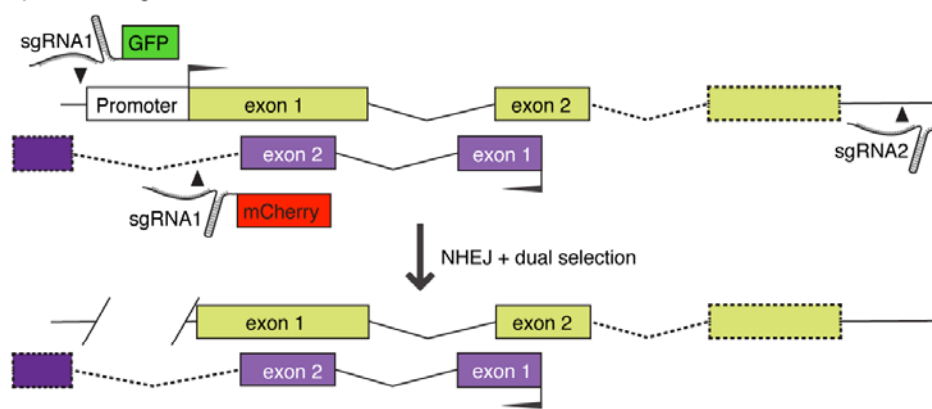

### D) Introduction of RDEs

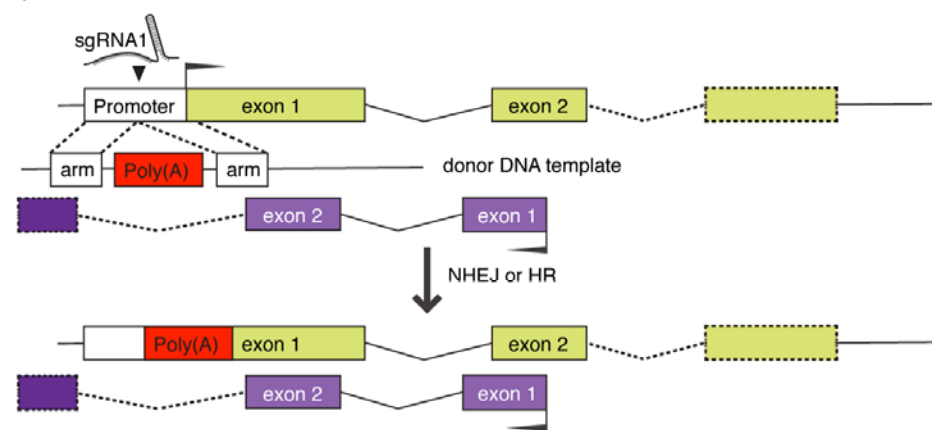

Legend:  
■ LncRNA exons (green)  
■ Protein-coding gene (purple)  
■ Functional motif (orange)
